# Supplementary material
Source: publisher site journal article supplement (https://neobiota.pensoft.net/article/83342/download/suppl/32/)
Supplement: Supplementary file 1

| (a) | (b) |
| --- | --- |
|  |  |
| (c) | (d) |
|  |  |
| (e) | (f) |
|  |  |

**Figure 3.** Relationship between socio-economic impacts with log-transformed morphological traits: (a) mean fruit crop size, (b) mean fruit size, (c) mean seed size, and environmental impacts with log-transformed morphological traits: (d) mean seed size, (e) mean fruit size, and (f) mean fruit crop size. (Each dot represents a species)
